# Supplementary material
Source: PubMed Central journal article supplement (PMC1276058)
Supplement: pnas_0504908102_1.pdf [file pnas_0504908102_1.pdf]

# Monoamine content of various brain regions of wild-type (BL6) and *Ptger1*<sup>-/-</sup> mice

| Brain region           | Genotype                     | Content (ng/g tissue) |           |          |         |          |        |
|------------------------|------------------------------|-----------------------|-----------|----------|---------|----------|--------|
|                        |                              | NE                    | DA        | DOPAC    | HVA     | 5-HT     | 5-HIAA |
| Frontal cortex         | BL6                          | 1689±53               | 279±44    | 59±20    | 532±34  | 762±44   | 89±7.6 |
|                        | <i>Ptger1</i> <sup>-/-</sup> | 1543±139              | 165±15*   | 87±12    | 726±93  | 665±33   | 87±16  |
| Parietal cortex        | BL6                          | 1868±190              | 395±99    | 148±58   | 297±64  | 555±35   | 49±3.8 |
|                        | <i>Ptger1</i> <sup>-/-</sup> | 2448±336              | 425±89    | 312±44*  | 435±111 | 599±50   | 76±11  |
| Striatum               | BL6                          | 596±53                | 4525±239  | 140±27   | 241±22  | 339±12   | 72±6.7 |
|                        | <i>Ptger1</i> <sup>-/-</sup> | 677±42                | 3533±341* | 222±55   | 322±34  | 437±42   | 89±18  |
| Midbrain               | BL6                          | 1890±104              | 258±98    | 35±8.4   | 84±11   | 1366±209 | 258±47 |
|                        | <i>Ptger1</i> <sup>-/-</sup> | 1981±56               | 185±19    | 34±3.8   | 103±8.5 | 1533±153 | 396±79 |
| Hippocampus            | BL6                          | 4341±88               | 574±33    | 40±1.8   | 265±37  | 2809±106 | 734±31 |
|                        | <i>Ptger1</i> <sup>-/-</sup> | 3811±91**             | 778±74*   | 48±5.9   | 211±24  | 2577±139 | 740±97 |
| Thalamus-hypothalamus  | BL6                          | 3019±241              | 672±231   | 57±7.3   | 252±17  | 2198±110 | 523±28 |
|                        | <i>Ptger1</i> <sup>-/-</sup> | 2849±82               | 844±175   | 61±4.9   | 253±39  | 1991±89  | 558±62 |
| Medulla oblongata-pons | BL6                          | 1944±94               | 95±21     | 23±1.9   | 103±12  | 1377±71  | 275±16 |
|                        | <i>Ptger1</i> <sup>-/-</sup> | 1706±108              | 59±6.2    | 14±1.7** | 108±11  | 1067±150 | 230±33 |
| Cerebellum             | BL6                          | 1602±120              | 42±6.7    | 13±2.8   | 100±36  | 666±134  | 109±42 |
|                        | <i>Ptger1</i> <sup>-/-</sup> | 1545±69               | 58±18     | 9.5±3.3  | 78±16   | 547±111  | 108±31 |

NE, norepinephrine
